# Supplementary material
Source: Springer Nature journal article supplement (https://www.springermedizin.de/resource/supplementary/12943_2010_715_MOESM10_ESM.pdf/9554644)

**A**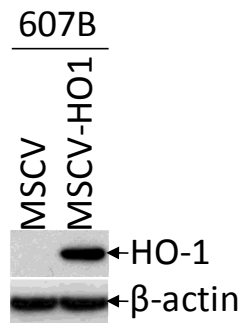**B**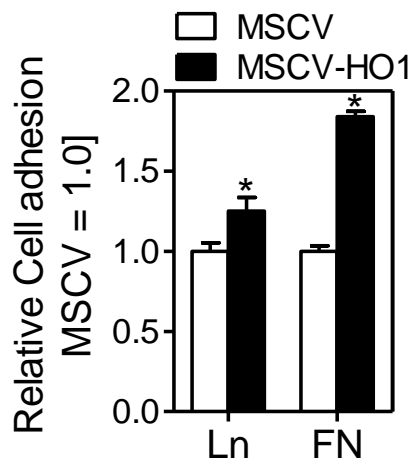**C**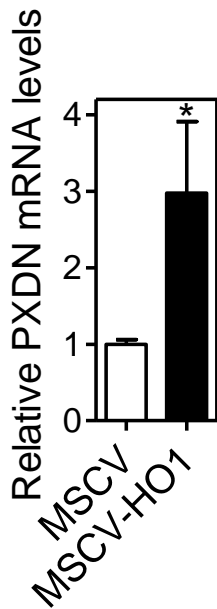**D**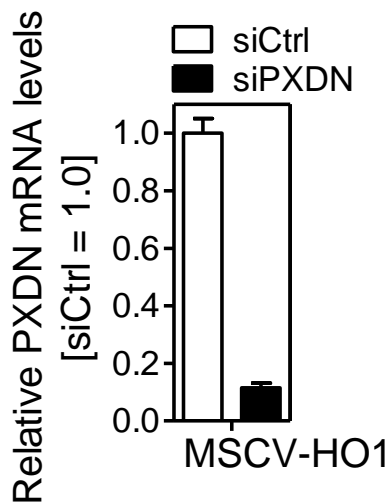**E**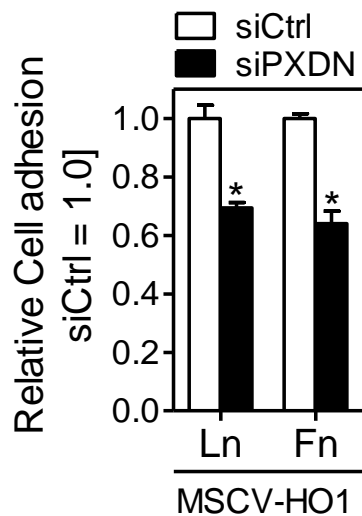

Supplement: MOESM10 [file 9554644]
